# Supplementary material for: Mann und Frau schmerzt es unterschiedlich
Source: Springer Nature journal article supplement (doi:10.1007/s41906-023-2031-8), 2023-03-17
Supplement: MOESM1 [file 24635656]

## Literatur

### zum Beitrag „Mann und Frau schmerzt es unterschiedlich“

von Joachim Graf, Harald Abele

*PflegeZeitschrift* (76) 4/2023, S. 40-41

Alabas, O. A., Tashani, O. A., Tabasam, G., & Johnson, M. I. (2012). Gender role affects experimental pain responses: a systematic review with meta-analysis. *European journal of pain* (London, England), 16(9), 1211–1223. <https://doi.org/10.1002/j.1532-2149.2012.00121.x>

Bartley, E. J., & Fillingim, R. B. (2013). Sex differences in pain: a brief review of clinical and experimental findings. *British journal of anaesthesia*, 111(1), 52–58. <https://doi.org/10.1093/bja/aet127>

Brucker, S.Y. & Simoes, E. (2023). Frauengesundheit. In: Brucker, S.Y., Doubek, K., Scharl, A., Simoes, E. & Wallwiener, D. (Hrsg.). *Frauengesundheit – Frauenmedizin. Fachübergreifend und kompakt* (S. 1-18). München: Elsevier Verlag.

Buzer.de (2023). § 20 - Sozialgesetzbuch (SGB) Fünftes Buch (V) - Gesetzliche Krankenversicherung - (SGB V). URL: [https://www.buzer.de/20\\_SGB\\_V.htm](https://www.buzer.de/20_SGB_V.htm) (Zugriff: 03.02.2023).

Chen, E. H., Shofer, F. S., Dean, A. J., Hollander, J. E., Baxt, W. G., Robey, J. L., Sease, K. L., & Mills, A. M. (2008). Gender disparity in analgesic treatment of emergency department patients with acute abdominal pain. *Academic emergency medicine: official journal of the Society for Academic Emergency Medicine*, 15(5), 414–418. <https://doi.org/10.1111/j.1553-2712.2008.00100.x>

Dahlgren, G. & Whitehead, M. (1991). *Policies and strategies to promote social equity in health*. Stockholm: Institute for Future Studies.

Fair, F., Raben, L., Watson, H., Vivilaki, V., van den Muijsenbergh, M., Soltani, H., & ORAMMA team (2020). Migrant women's experiences of pregnancy, childbirth and maternity care in European countries: A systematic review. *PloS one*, 15(2), e0228378. <https://doi.org/10.1371/journal.pone.0228378>

Fillingim, R. B., & Gear, R. W. (2004). Sex differences in opioid analgesia: clinical and experimental findings. *European journal of pain* (London, England), 8(5), 413–425. <https://doi.org/10.1016/j.ejpain.2004.01.007>

Glezerman, M. (2016). *Gender Medicine: The Groundbreaking New Science of Gender- and Sex-Based Diagnosis and Treatment*. New York: The Overlook Press.

Graf, J. (2023). Prävention: Definitionen und Ansätze. In: Brucker, S.Y., Doubek, K., Scharl, A., Simoes, E. & Wallwiener, D. (Hrsg.). *Frauengesundheit – Frauenmedizin. Fachübergreifend und kompakt* (S. 175-178). München: Elsevier Verlag.

Guðmundsdóttir, E. Ý., Nieuwenhuijze, M., Einarsdóttir, K., Hálfhánsdóttir, B., & Gottfreðsdóttir, H. (2022). Use of pain management in childbirth among migrant women in Iceland: A population-based cohort study. *Birth (Berkeley, Calif.)*, 49(3), 486–496. <https://doi.org/10.1111/birt.12619>

Hirsh, A. T., Hollingshead, N. A., Matthias, M. S., Bair, M. J., & Kroenke, K. (2014). The influence of patient sex, provider sex, and sexist attitudes on pain treatment decisions. *The journal of pain*, 15(5), 551–559. <https://doi.org/10.1016/j.jpain.2014.02.003>

Isorni, M. A., Blanchard, D., Teixeira, N., le Breton, H., Renault, N., Gilard, M., Lefèvre, T., Mulak, G., Danchin, N., Spaulding, C., & Puymirat, E. (2015). Impact of gender on use of revascularization in acute coronary syndromes: the national observational study of diagnostic and interventional cardiac catheterization (ONACI). *Catheterization and cardiovascular interventions : official journal of the Society for Cardiac Angiography & Interventions*, 86(2), E58–E65. <https://doi.org/10.1002/ccd.25921>

Ketepe-Arachi, T., & Sharma, S. (2017). Cardiovascular Disease in Women: Understanding Symptoms and Risk Factors. *European cardiology*, 12(1), 10–13. <https://doi.org/10.15420/ecr.2016:32:1>

Kolip, P. (2013). Gender als Determinante gesundheitlicher Ungleichheit. *Jahrbuch für kritische Medizin und Gesundheitswissenschaften*, 45, 57-69.

Lloyd, E. P., Paganini, G. A., & ten Brinke, L. (2020). Gender Stereotypes Explain Disparities in Pain Care and Inform Equitable Policies. *Policy Insights from the Behavioral and Brain Sciences*, 7(2), 198–204. <https://doi.org/10.1177/2372732220942894>

Lord, B., Cui, J., & Kelly, A. M. (2009). The impact of patient sex on paramedic pain management in the prehospital setting. *The American journal of emergency medicine*, 27(5), 525–529. <https://doi.org/10.1016/j.ajem.2008.04.003>

Ohlmeier, C., Mikolajczyk, R., Frick, J., Prütz, F., Haverkamp, W., & Garbe, E. (2015). Incidence, prevalence and 1-year all-cause mortality of heart failure in Germany: a study based on electronic healthcare data of more than six million persons. *Clinical research in cardiology: official journal of the German Cardiac Society*, 104(8), 688–696. <https://doi.org/10.1007/s00392-015-0841-4>

Osborne, N. R., & Davis, K. D. (2022). Sex and gender differences in pain. *International review of neurobiology*, 164, 277–307. <https://doi.org/10.1016/bs.irn.2022.06.013>

Yang, Y., Carlin, A. S., Faustino, P. J., Motta, M. I., Hamad, M. L., He, R., Watanuki, Y., Pinnow, E. E., & Khan, M. A. (2009). Participation of women in clinical trials for new drugs approved by the food and drug administration in 2000-2002. *Journal of women's health (2002)*, 18(3), 303–310. <https://doi.org/10.1089/jwh.2008.0971>
